# Supplementary material for: Holocene sea-level change on the west coast Bohai Bay, China
Source: Copernicus journal article supplement (doi:10.5194/esurf-2020-21), 2020-04-16
Supplement: Supplementary file [file esurf-2020-21-AC1-supplement.pdf]

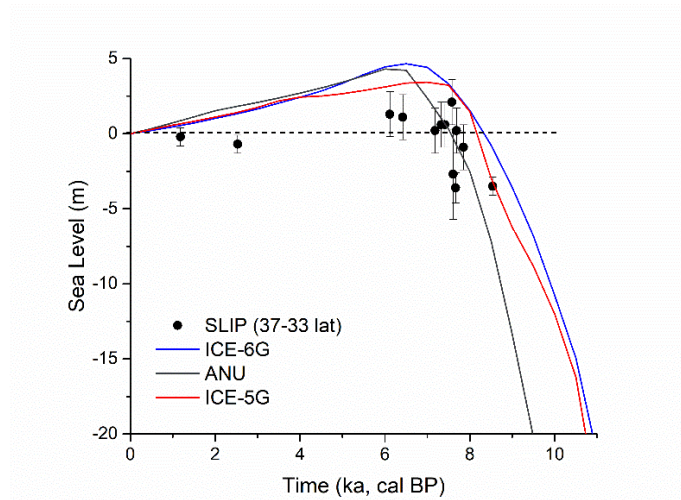

**Fig. S1.** The comparison of SLIPs generated for the coast south of Bohai Bay (latitude 37°N – 33°N; adopted from Lambeck et al., 2014) and GIA models employed in this study.

**Table S1.** Parameters used by GIA models employed in this study (SELEN) compared the model established by Bradley et al. (2016; BRAD).

| Parameter/Result                                                | BRAD                  | ANU (SELEN)          | ICE 5G (SELEN)       | ICE 6G (SELEN)       |
|-----------------------------------------------------------------|-----------------------|----------------------|----------------------|----------------------|
| Lithospheric thickness (km)                                     | 96                    | 65                   | 90                   | 90                   |
| Upper mantle viscosity (Pa s)                                   | $<1.5 \times 10^{20}$ | $0.5 \times 10^{21}$ | $0.5 \times 10^{21}$ | $0.5 \times 10^{21}$ |
| Lower mantle viscosity (Pa s)                                   | $8 \times 10^{21}$    | $10 \times 10^{21}$  | $2.7 \times 10^{21}$ | $3.2 \times 10^{21}$ |
| Antarctic contribution to ESL (m) and end of melting (until ka) | 28 until 1            | 30 until 1           | 17.5 until 4         | 13.6 until 4         |
| Holocene highstand (m@ka)                                       | $<0.5 @ 7$            | $4.3 @ 6$            | $3.4 @ 7$            | $4.7 @ 6.5$          |

**Table S2.** Survey data and lithostratigraphy of cores.

| Depth (m)                                                          | Alt. (m, asl)  | Description                                                                                                                 |
|--------------------------------------------------------------------|----------------|-----------------------------------------------------------------------------------------------------------------------------|
| <i>Core DC01 (38°40'09", 116°39'10", ground altitude: +3.74 m)</i> |                |                                                                                                                             |
| 1.0–6.50                                                           | 2.74 to -2.76  | Yellowish brown to grey clayey silt with rusting stains                                                                     |
| 6.5–9.40                                                           | -2.76 to -5.66 | Yellowish grey silty clay with black peat layers in various depths                                                          |
| 9.4–12.6                                                           | -5.66 to -8.86 | Brown grey clayey silt with calcium nucleus at base (Pre-Holocene)                                                          |
| <i>Core QX01 (38°38'52", 116°48'58", ground altitude: +5.16 m)</i> |                |                                                                                                                             |
| 1.0–5.00                                                           | 4.16 to 0.16   | Brown to grey clayey silt with thick laminations and rusting stains                                                         |
| 5.0–9.10                                                           | 0.16 to -3.94  | Brownish grey clayey silt with thin (5 cm thick) layers of charcoal, organic material and shell fragments in various depths |
| 9.1–11.4                                                           | -3.94 to -6.24 | Brownish grey clayey silt with small amount of charcoal and shell fragments                                                 |
| 11.4–13.8                                                          | -6.24 to -8.64 | Grey to brownish grey clayey silt laminations, with black peat layers and a sharp contact at upper boundary                 |
| 13.8–19.6                                                          | -8.64 to -14.4 | Yellowish brown sandy silt (Pre-Holocene)                                                                                   |
| <i>Core QX03 (38°38'52", 116°53'43", ground altitude: +4.38 m)</i> |                |                                                                                                                             |

| Depth (m)                                                          | Alt. (m, asl)    | Description                                                                                                                  |
|--------------------------------------------------------------------|------------------|------------------------------------------------------------------------------------------------------------------------------|
| 1.2–4.8                                                            | 3.18 to -0.42    | Dark brown clayey silt with small amount of charcoal. Calcium nucleus and shells in 2.9 – 3.1 m depth                        |
| 4.8–8.9                                                            | -0.42 to -4.52   | Dark greyish brown clayey silt with laminations and small amount of shell fragments                                          |
| 8.9–13.7                                                           | -3.52 to -9.32   | Greyish brown to grey clayey silt with a black peat layer in 12.4-12.5 m depth                                               |
| 13.7–16.0                                                          | -9.32 to -11.6   | Brown clayey silt, with rusting stains and thick laminations (Pre-Holocene)                                                  |
| <b>Core QX02</b> (38°38'24", 116°57'24", ground altitude: +3.57 m) |                  |                                                                                                                              |
| 1.0–3.90                                                           | 2.57 to -0.33    | Yellowish brown clayey silt with small amount of charcoal                                                                    |
| 3.9–11.3                                                           | -0.33 to -7.73   | Brownish grey clayey silt, with shell fragments and rusting stains, and several organic-rich layers                          |
| 11.3–16.6                                                          | -7.73 to -13.0   | Yellowish brown clayey silt, with charcoal and fine sand at base, and black peat layers                                      |
| 16.6–20.3                                                          | -13.0 to -16.7   | Yellowish brown clayey silt, with calcium nucleus developed in various sizes (Pre-Holocene)                                  |
| <b>Core ZW15</b> (38°40'26", 117°13'20", ground altitude: +1.63 m) |                  |                                                                                                                              |
| 0.8–2.2                                                            | 0.83 to -0.57    | Brown clayey silt, with rusting stains, laminations and an increase in organic matter at 1.60 m of depth                     |
| 2.2–12.6                                                           | -0.57 to -10.97  | Greyish brown clayey silt, with small amount of marine shells, laminations throughout                                        |
| 12.6–15.2                                                          | -10.97 to -13.57 | Grey clayey silt with peat layers at various depths                                                                          |
| 15.2–17.0                                                          | -13.57 to -15.37 | Dark yellowish brown clayey silt, with rusting stains and calcium nucleus (Pre-Holocene)                                     |
| <b>Core Q7</b> (38°39'24", 117°31'27", ground altitude: +3.46 m)   |                  |                                                                                                                              |
| 0.0–7.0                                                            | 3.46 to -3.54    | Brown silt, with laminations and marine shells                                                                               |
| 7.0–18.7                                                           | -3.54 to -15.24  | Dark grey clayey silt, with shell fragments                                                                                  |
| 18.7–18.9                                                          | -15.24 to -15.44 | Dark brown peaty clay overlying yellowish brown sandy sediment (the latter as Pre-Holocene)                                  |
| 18.9–25.0                                                          | -15.44 to -21.54 | Yellowish brown silt sand (Pre-Holocene)                                                                                     |
| <b>Core CZ01</b> (38°22'29", 116°46'31", ground altitude: +6.89 m) |                  |                                                                                                                              |
| 1.0– 6.4                                                           | 5.89 to 0.49     | Dark brown clayey silt, with fine laminations, charcoal, Fe/Mn concretion, and freshwater snails                             |
| 6.4–15.4                                                           | 0.49 to -8.51    | Dark yellowish brown clayey silt, with rusting stains and calcium nucleus. Black peat layers in various depths               |
| 15.8–20.0                                                          | -8.91 to -13.11  | Very dark greyish brown to very dark grey silt (Pre-Holocene)                                                                |
| <b>Core CZ02</b> (38°21'28", 116°54'50", ground altitude: +5.77 m) |                  |                                                                                                                              |
| 1.0–4.4                                                            | 4.77 to 1.37     | Dark yellowish brown clayey silt, with Fe/Mn concretion.                                                                     |
| 4.4–15.0                                                           | 1.37 to -9.23    | Brown to light greyish brown silt, with laminations, rusting stains and calcium nucleus. Black peat layers at various depths |
| 15.0–20.0                                                          | -9.23 to -14.23  | Yellowish brown silt, with rusting stains and calcium nucleus (Pre-Holocene)                                                 |
| <b>Core CZ03</b> (38°22'19", 117°06'29", ground altitude: +3.94 m) |                  |                                                                                                                              |
| 1.0–4.4                                                            | 2.94 to -0.46    | Dark yellowish brown clayey silt, with rusting stains and Fe/Mn concretion                                                   |
| 4.4–9.3                                                            | -0.46 to -5.36   | Dark grey brown clayey silt, with laminations and shell fragments. Organic clay and peat in various depths                   |
| 9.3–15.0                                                           | -5.36 to -11.06  | Grey silt with charcoal and two black peat layers                                                                            |
| 15.0–16.0                                                          | -11.06 to -12.06 | Yellowish brown sandy silt (Pre-Holocene)                                                                                    |
| <b>Core CZ87</b> (38°31'39", 116°54'38", ground altitude: +4.46 m) |                  |                                                                                                                              |
| 0.0–5.8                                                            | 4.46 to -1.34    | Light grey to brown clayey silt, with laminations, Fe/Mn concretions and rusting stains                                      |

| Depth (m)                                                          | Alt. (m, asl)    | Description                                                                                                         |
|--------------------------------------------------------------------|------------------|---------------------------------------------------------------------------------------------------------------------|
| 5.8–11.5                                                           | -1.34 to -7.04   | Yellowish brown clayey silt, with small amount of shell fragments                                                   |
| 11.5–16.0                                                          | -7.04 to -11.54  | Grey clayey silt, with charcoal, laminations and black peats                                                        |
| 16.0–20.0                                                          | -11.54 to -15.54 | Greyish brown silt (Pre-Holocene)                                                                                   |
| <b>Core CZ61</b> (38°33'29", 116°58'50", ground altitude: +3.76 m) |                  |                                                                                                                     |
| 0.0–4.5                                                            | 3.76 to -0.74    | Yellowish brown clayey silt and silt, with charcoal                                                                 |
| 4.5–9.7                                                            | -0.74 to -5.94   | Brown to grey clayey silt, with marine shell fragments. Organic clay at various depths                              |
| 9.7–14.7                                                           | -5.94 to -10.94  | Very dark grey clayey silt, with laminations. Peats in various depths                                               |
| 14.7–18.0                                                          | -10.94 to -14.24 | Yellowish brown clayey silt, with laminations and small amount of calcium nucleus (Pre-Holocene)                    |
| <b>Core CZ65</b> (38°34'47", 117°04'17", ground altitude: +2.96 m) |                  |                                                                                                                     |
| 0.0–3.8                                                            | 2.96 to -0.84    | Dark brown clayey silt, with laminations and charcoal                                                               |
| 3.8–9.7                                                            | -0.84 to -6.74   | Grey silt, with rusting stains, laminations and charcoal in upper and lower ends, marine shells in the middle       |
| 9.7–13.8                                                           | -6.74 to -10.84  | Grey clay and silt, with laminations and charcoal and a black peat layer                                            |
| 13.8–16.6                                                          | -10.84 to -13.64 | Brown to grey brown clayey silt, with Fe/Mn concretion, calcium nucleus and freshwater snails (Pre-Holocene)        |
| <b>Core CZ80</b> (38°26'12", 116°53'39", ground altitude: +6.42 m) |                  |                                                                                                                     |
| 0.0–5.4                                                            | 6.42 to 1.02     | Light yellowish brown to greyish brown clayey silt, with laminations, rusting stains, charcoals and dark grey peats |
| 5.4–10.0                                                           | 1.02 to -3.58    | Dark grey clayey silt and fine silt, with organic clay in various depths                                            |
| 10.0–14.0                                                          | -3.58 to -7.58   | Grey fine silt and clayey silt, with rusting stains and charcoal. Black peats in various depths                     |
| 14.0–17.0                                                          | -7.58 to -10.58  | Yellowish brown clayey silt, with laminations in upper layer (Pre-Holocene)                                         |
| <b>Core CZ85</b> (38°28'09", 117°01'10", ground altitude: +4.61 m) |                  |                                                                                                                     |
| 0.5–3.6                                                            | 4.11 to 1.01     | Dark yellowish brown clayey silt, with plant roots at surface, and charcoals, Fe/Mn concretions in the lower part   |
| 3.6–8.8                                                            | 1.01 to -4.19    | Brown clayey silt, with rusting stains, charcoals. Organic clay in various depths                                   |
| 8.8–15.8                                                           | -4.19 to -11.19  | Dark grey silt, with charcoal and black peats                                                                       |
| 15.8–17.7                                                          | -11.19 to -13.09 | Light grey clayey silt, with a few calcium nucleus at base (Pre-Holocene)                                           |
| <b>Core CZ66</b> (38°31'29", 117°07'59", ground altitude: +3.87 m) |                  |                                                                                                                     |
| 1.0–3.6                                                            | 2.87 to 0.27     | Yellowish brown clayey silt, with Fe/Mn concretion in lower part                                                    |
| 3.6–6.3                                                            | 0.27 to -2.43    | Yellowish brown clayey silt, with charcoal and organic clay in various depths                                       |
| 6.3–10.8                                                           | -2.43 to -6.93   | Yellowish brown silt, with rusting stains and small amount of marine shells                                         |
| 10.8–14.0                                                          | -6.93 to -10.13  | Light yellowish grey to grey silt and clay, with charcoal and black peats                                           |
| 14.0–16.6                                                          | -10.13 to -12.73 | Greyish brown clayey silt, with Fe/Mn concretion, freshwater snails and shells (Pre-Holocene)                       |
